# Supplementary material for: A transfer learning approach to facilitate ComBat-based harmonization of multicentre radiomic features in new datasets
Source: PubMed Central journal article supplement (PMC8248970; doi:10.1371/journal.pone.0253653), 2021-07-01
Supplement: pone.0253653.s004.pdf [file pone.0253653.s004.pdf]

| Characteristics                | Patients                             |                                       |              |
|--------------------------------|--------------------------------------|---------------------------------------|--------------|
|                                | Brest                                | Nantes                                | McGill       |
|                                | <i>n=117</i>                         | <i>n=44</i>                           | <i>n=28</i>  |
| Age median (range)             | 58 (29-90)                           | 51 (23-73)                            | 52 (26-86)   |
| <b>FIGO Stage</b>              |                                      |                                       |              |
| IB1                            | 3                                    | 1                                     | 0            |
| IB2                            | 11                                   | 4                                     | 4            |
| IIA1                           | 7                                    | 3                                     | 0            |
| IIB                            | 61                                   | 27                                    | 14           |
| IIIA                           | 2                                    | 1                                     | 1            |
| IIIB                           | 18                                   | 3                                     | 7            |
| IVA                            | 15                                   | 3                                     | 2            |
| IVB                            |                                      |                                       |              |
| <b>Histology</b>               |                                      |                                       |              |
| Squamous                       | 94                                   | 40                                    | 24           |
| Adenocarcinoma                 | 17                                   | 1                                     | 1            |
| Adenosquamous carcinoma        | 1                                    | 0                                     | 0            |
| Clear cell carcinoma           | 5                                    | 3                                     | 3            |
| <b>Lymph node involvement</b>  |                                      |                                       |              |
| Uninvolved                     | 55                                   | 23                                    | 7            |
| Involved                       | 57                                   | 27                                    | 21           |
| Pelvic                         | 40                                   | 19                                    | 16           |
| Pelvic and para-aortic         | 17                                   | 8                                     | 5            |
| <b>CBC median (range)</b>      |                                      |                                       |              |
| White blood cells              | 8.1 10 <sup>3</sup> /ml (4.6 – 25.6) | 8.1 10 <sup>3</sup> /ml (4.6 – 25.6)  | X            |
| Hemoglobin                     | 127 g/dl (71 – 151)                  | 123 g/dl (67 – 147)                   | X            |
| Platelets                      | 257.3 10 <sup>3</sup> /ml (14 – 42)  | 273.9 10 <sup>3</sup> /ml (152 – 767) | X            |
| Body mass index median (range) | 23.1 (14 – 42)                       | 22.7 (13 – 39)                        | X            |
| <b>Treatment</b>               |                                      |                                       |              |
| 3D-CRT                         | 62                                   | 2                                     | 4            |
| IMRT                           | 55                                   | 42                                    | 24           |
| EBRT dose median (range)       | 45 (45 – 54)                         | 45 (45 – 54)                          | 45 (45 – 54) |
| BT dose median (range)         | 29 (21 – 28)                         | 29 (21 – 28)                          | 29 (21 – 28) |
| Overall treatment time (range) | 49 (48 – 53)                         | 49 (48 – 53)                          | 49 (48 – 53) |

*FIGO International Federation of Gynecology and Obstetrics, CBC complete blood counts, 3D-CRT three-dimensional conformal radiotherapy, IMRT intensity-modulated photon radiotherapy, EBRT external beam radiotherapy, BT brachytherapy*

**S1 Table.** Patient's characteristics.
